# Supplementary material
Source: publisher figshare collection journal article supplement (https://tandf.figshare.com/articles/dataset/_/2069463)

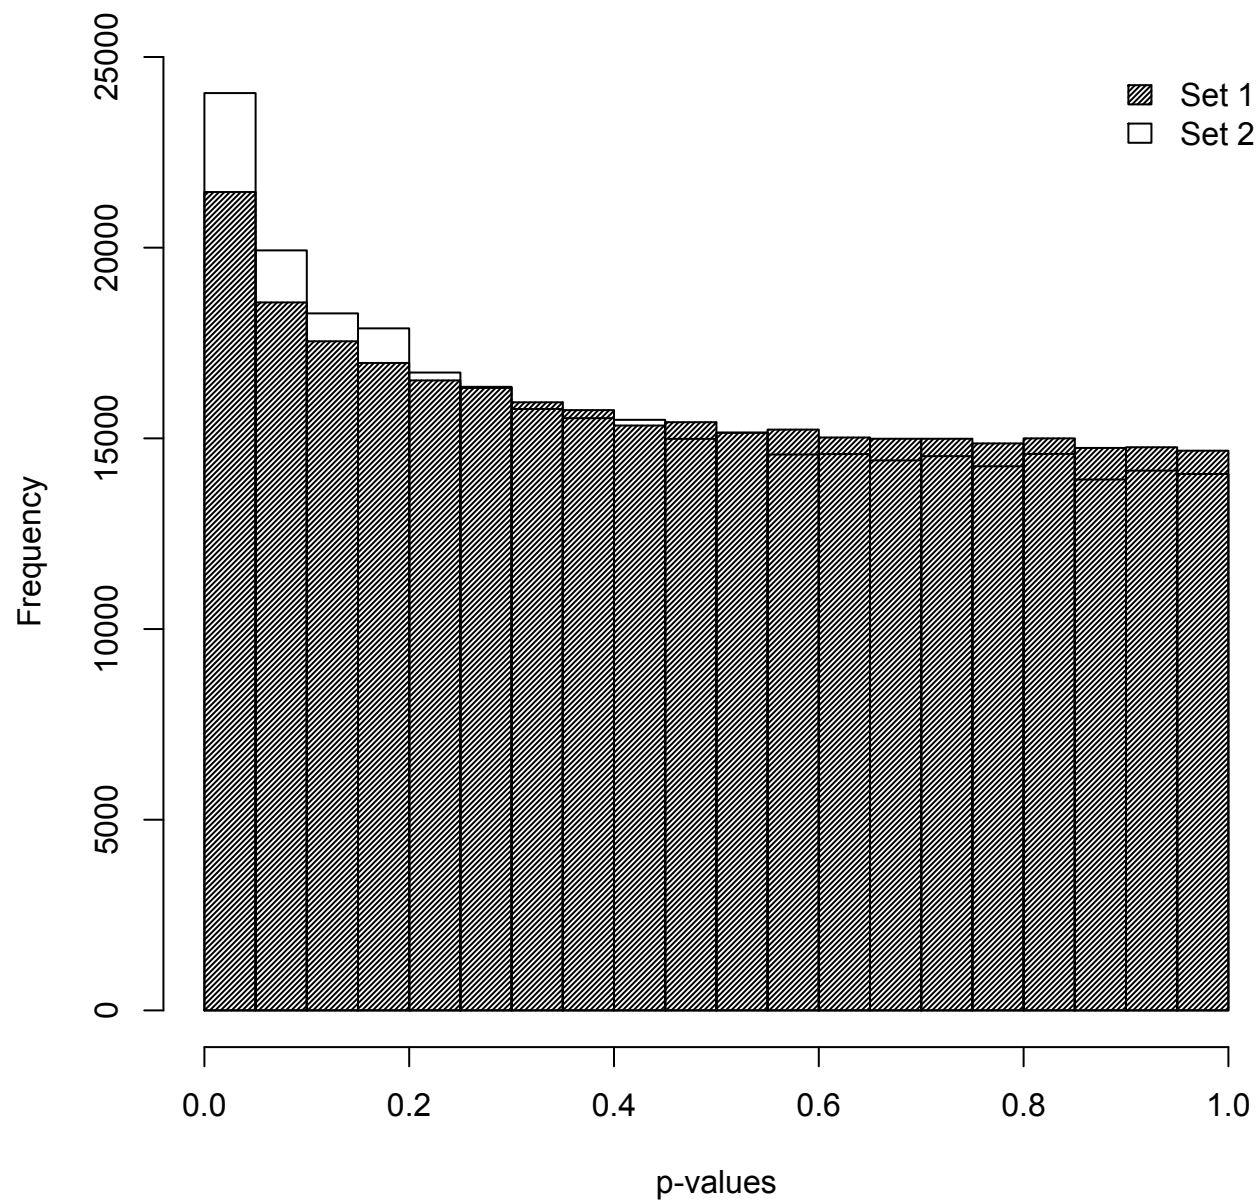

Chromosome 6

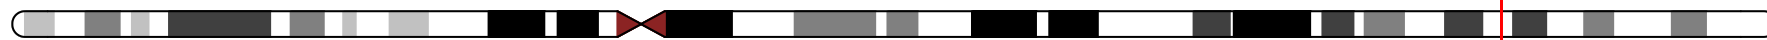

144.4711 mb

144.4713 mb

144.4715 mb

144.4717 mb

144.4719 mb

144.4721 mb

144.4723 mb

144.4712 mb

144.4714 mb

144.4716 mb

144.4718 mb

144.472 mb

144.4722 mb

144.4724 mb

STX11

CpG

Beta [set 1]

Beta [set 2]

0.00005

0

-0.00005

-0.0001

0

-0.00005

-0.0001

-0.00015

-0.0002

-0.00025

Suppl. Figure 2

Chromosome 14

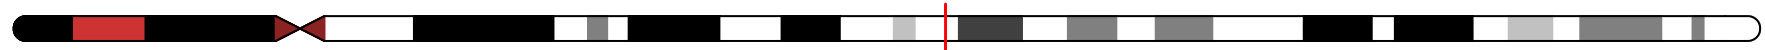

57.277 mb

57.279 mb

57.281 mb

57.278 mb

57.28 mb

OTX2

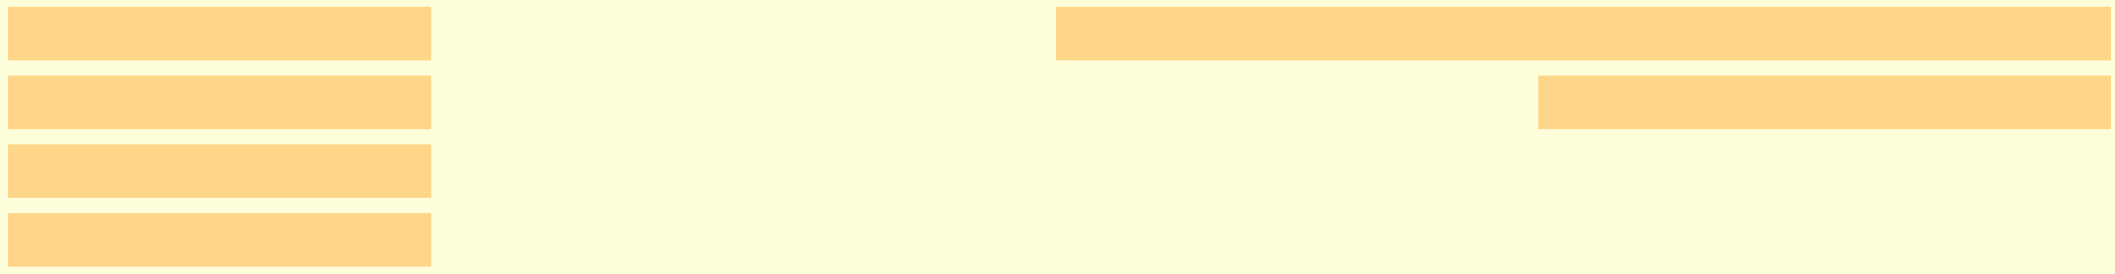

CpG

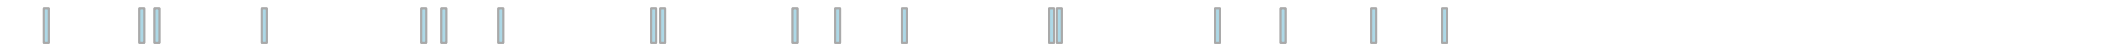

Beta [set 1]

0.00005  
0  
-0.00005  
-0.0001  
-0.00015  
-0.0002

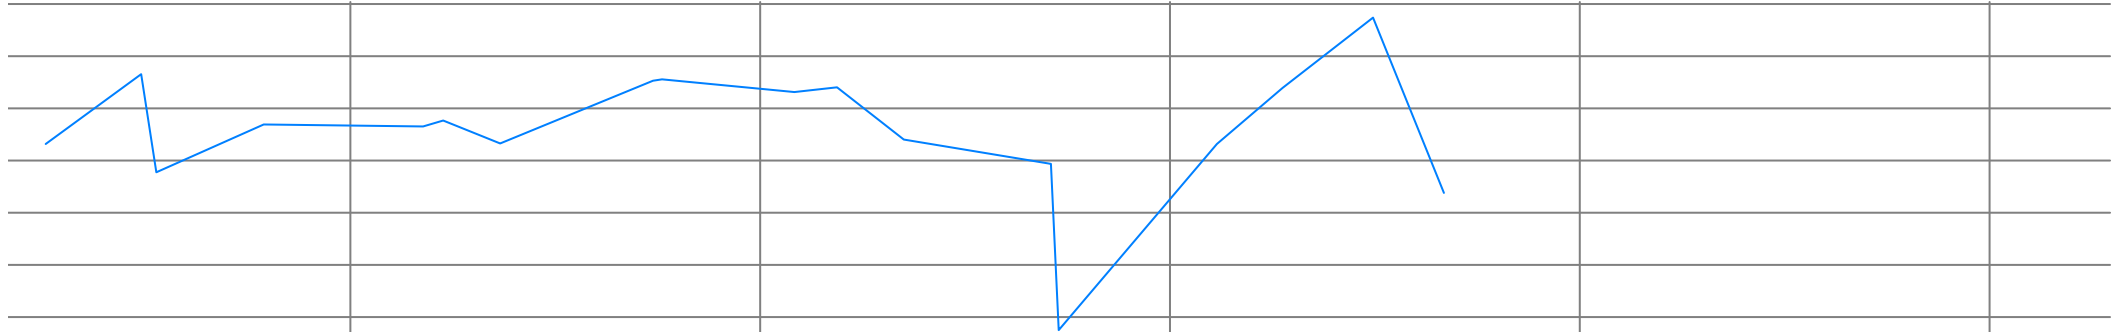

Beta [set 2]

0  
-0.0001  
-0.0002  
-0.0003

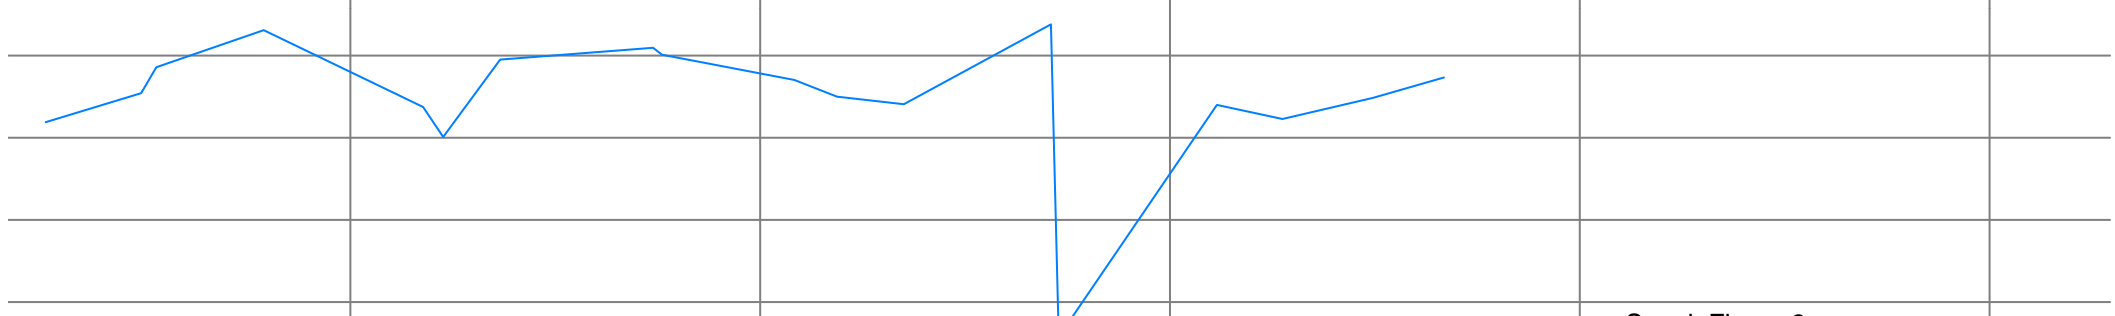

Supl. Figure 3

Chromosome 6

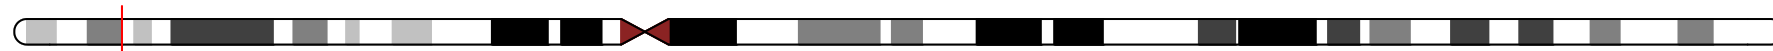

10.411 mb

10.412 mb

10.413 mb

10.4115 mb

10.4125 mb

TFAP2A

CpG

Beta [set 1]

Beta [set 2]

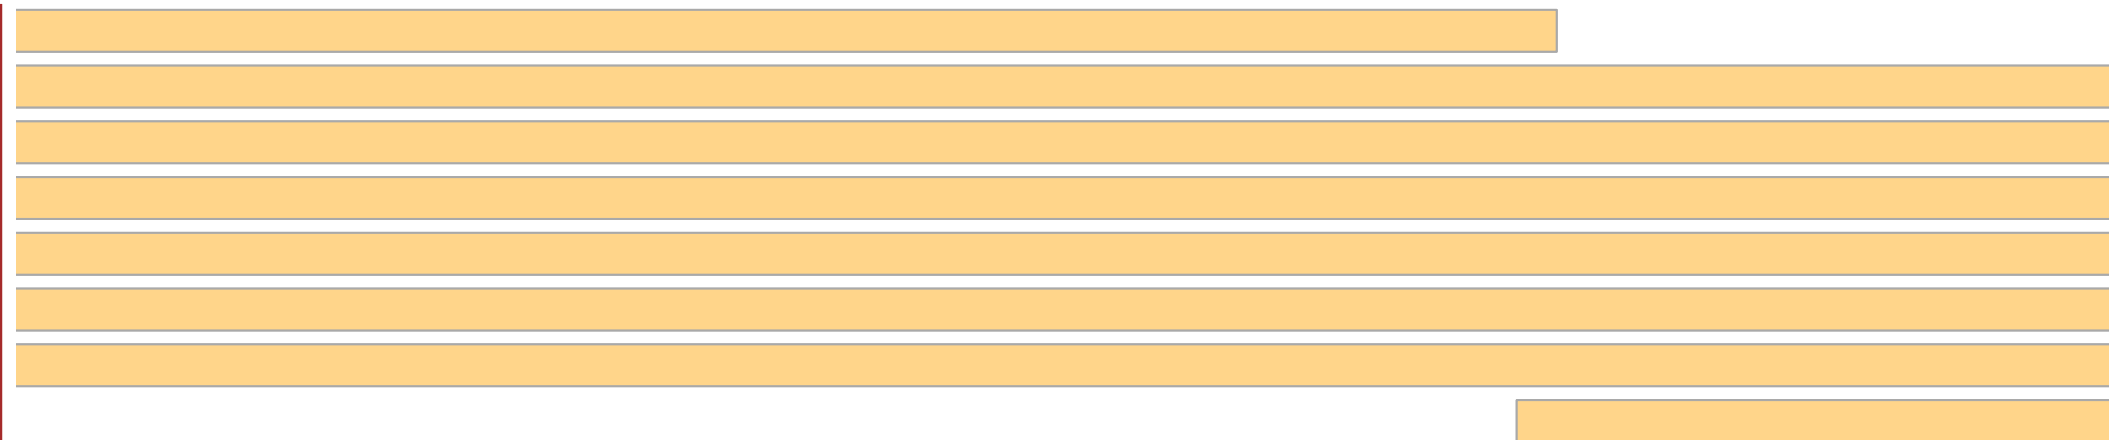

Suppl. Figure 4

Chromosome 2

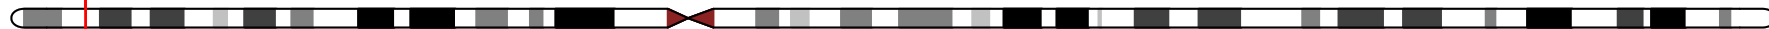

10.2203 mb

10.2205 mb

10.2206 mb

10.2207 mb

10.2208 mb

10.2204 mb

CpG CYS1

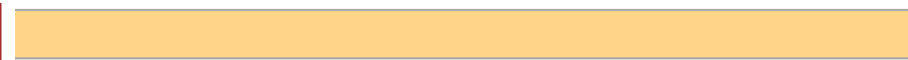

CpG

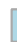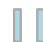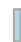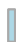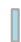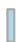

Beta [set 1]

0  
-0.00005  
-0.0001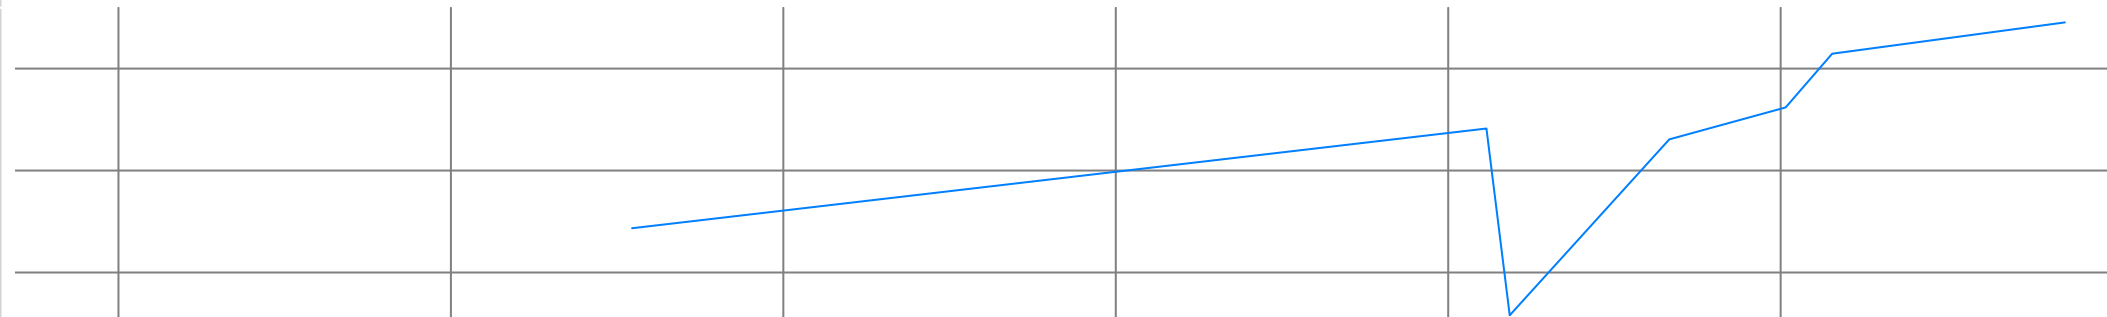

Beta [set 2]

0  
-0.00005  
-0.0001  
-0.00015  
-0.0002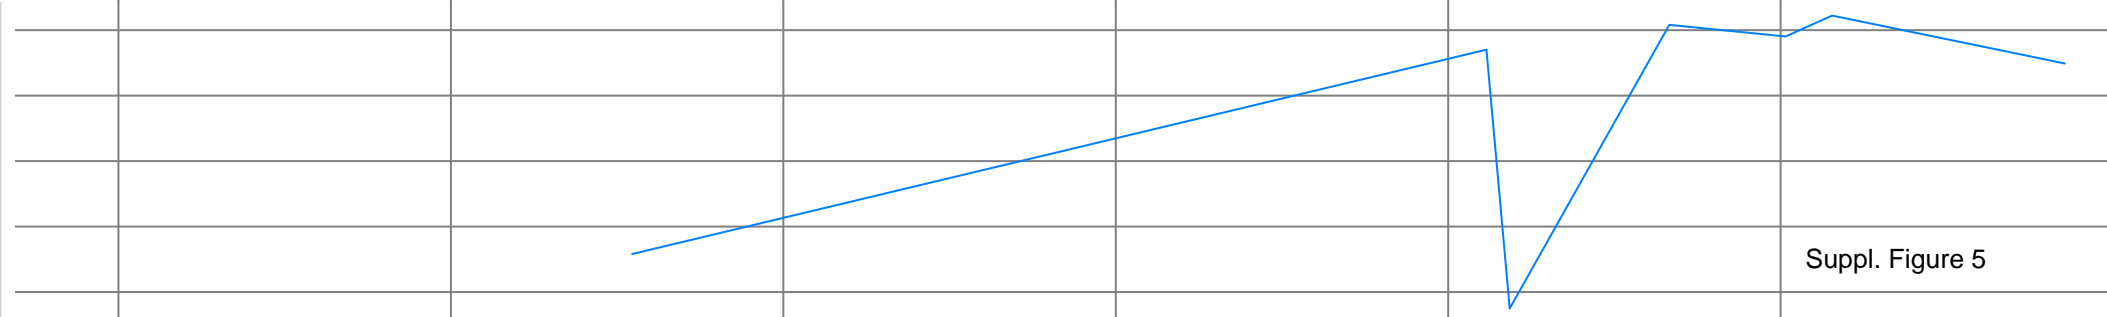

Suppl. Figure 5

*STX11* [cg22664307]

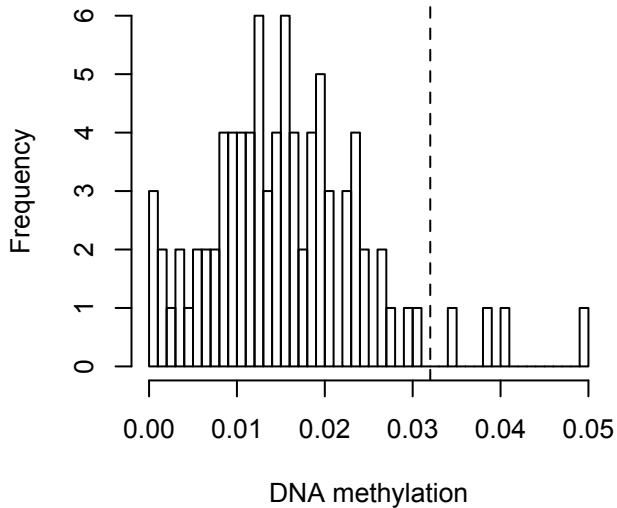

*OTX2* [cg21039708]

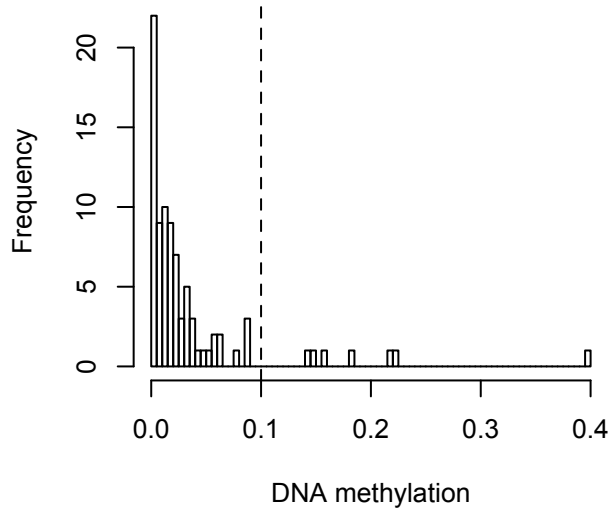

*TFAP2A* [cg15219145]

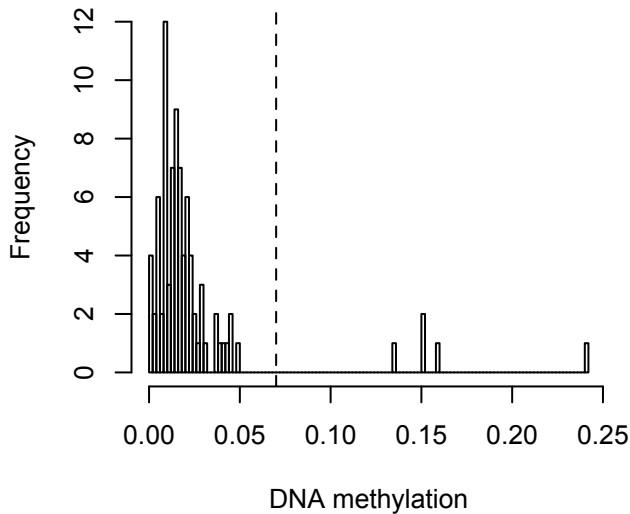

*CYS1* [cg13499966]

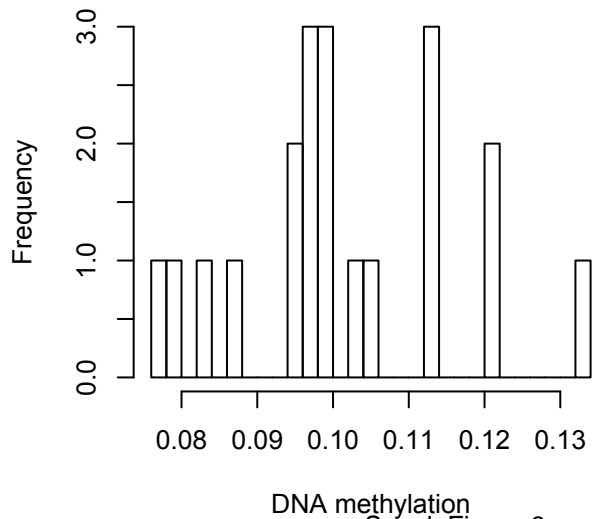

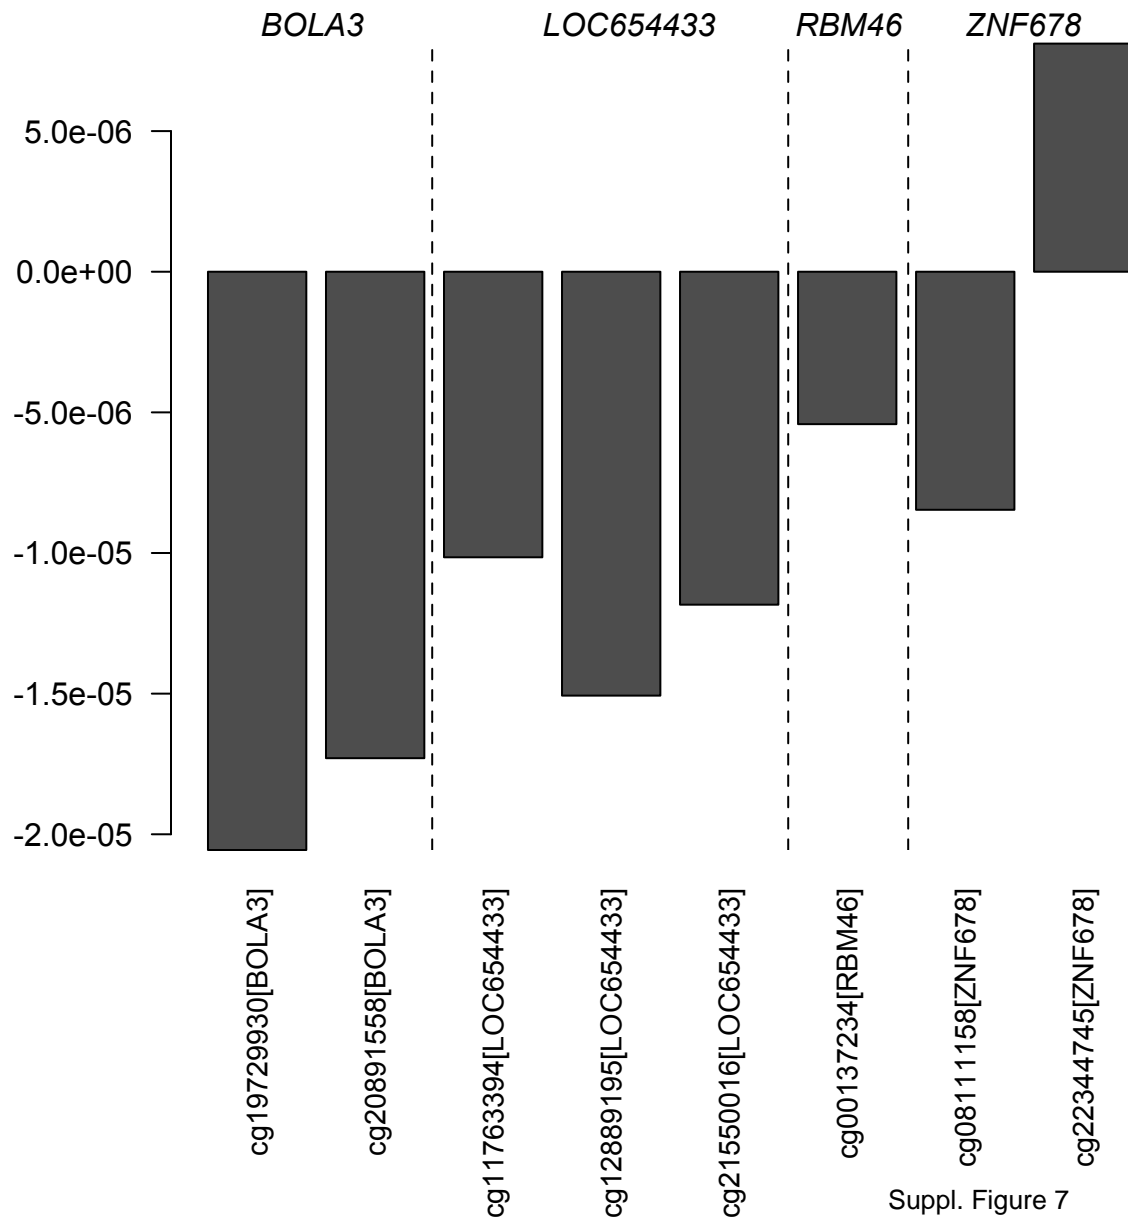

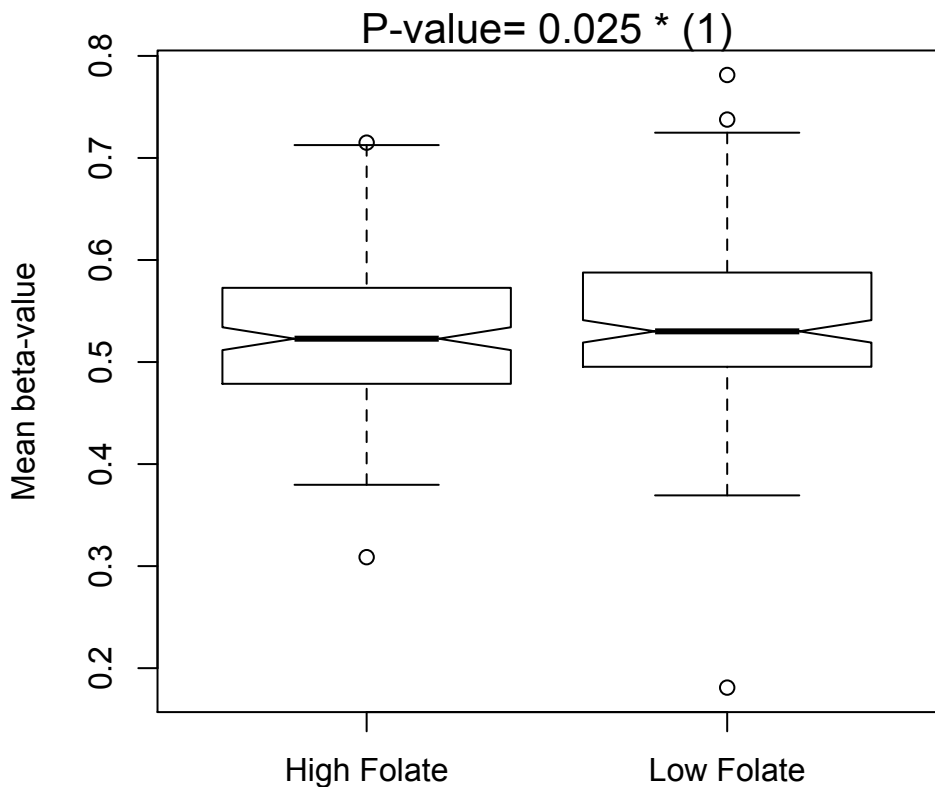

(1) Adjusted model for sex, race, gestational age, cell-mixture



Direction.  
of assoc. in  
Amarasekera  
et al.

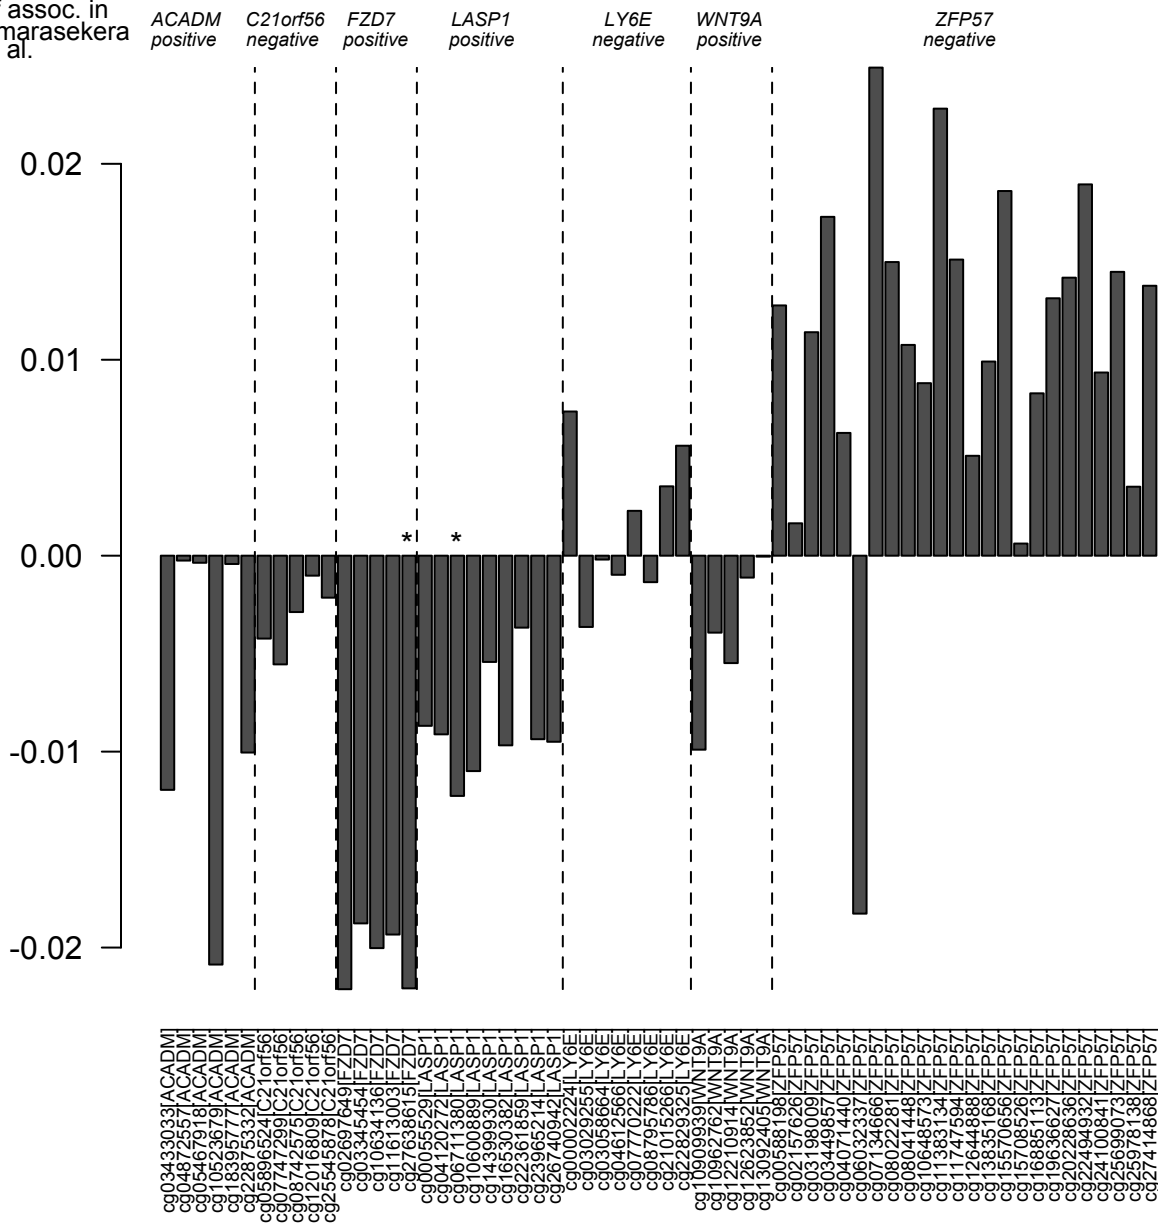

Supplement: Supplementary file 1 [file 1]
